# Supplementary figures and images for: Generalized linear mixed models can detect unimodal species-environment relationships
Source: PeerJ journal article supplement (doi:10.7717/peerj.95), 2013-07-09

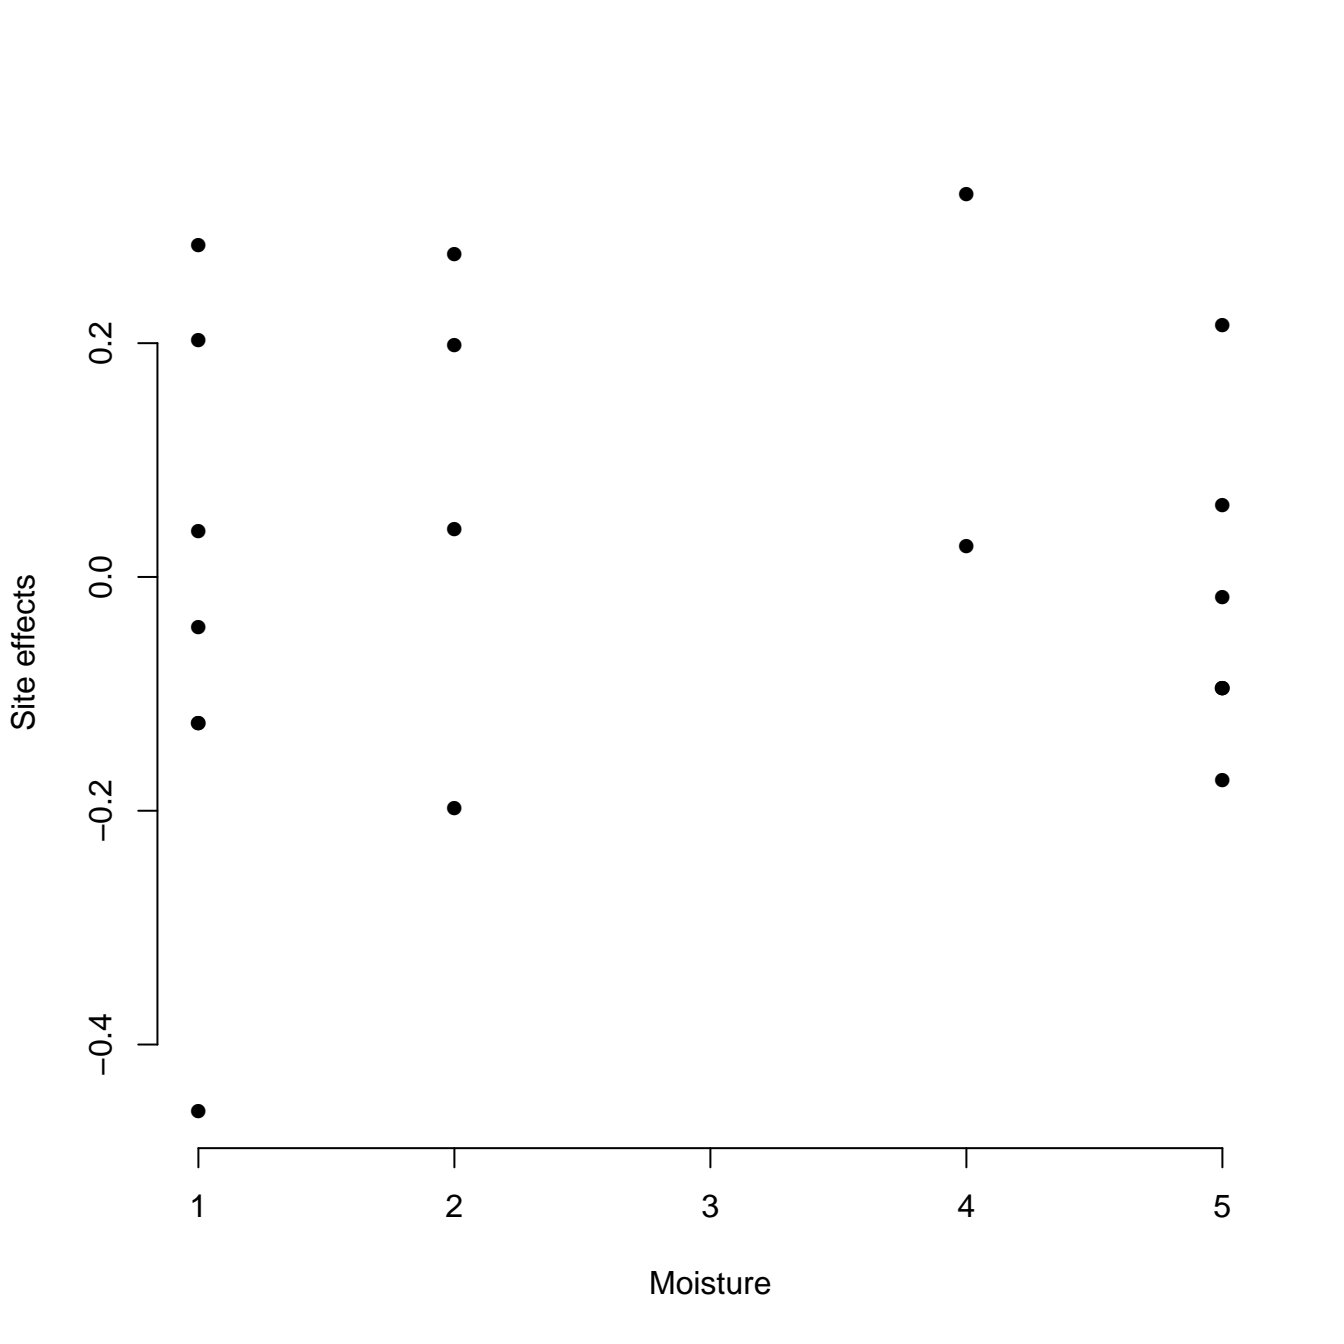

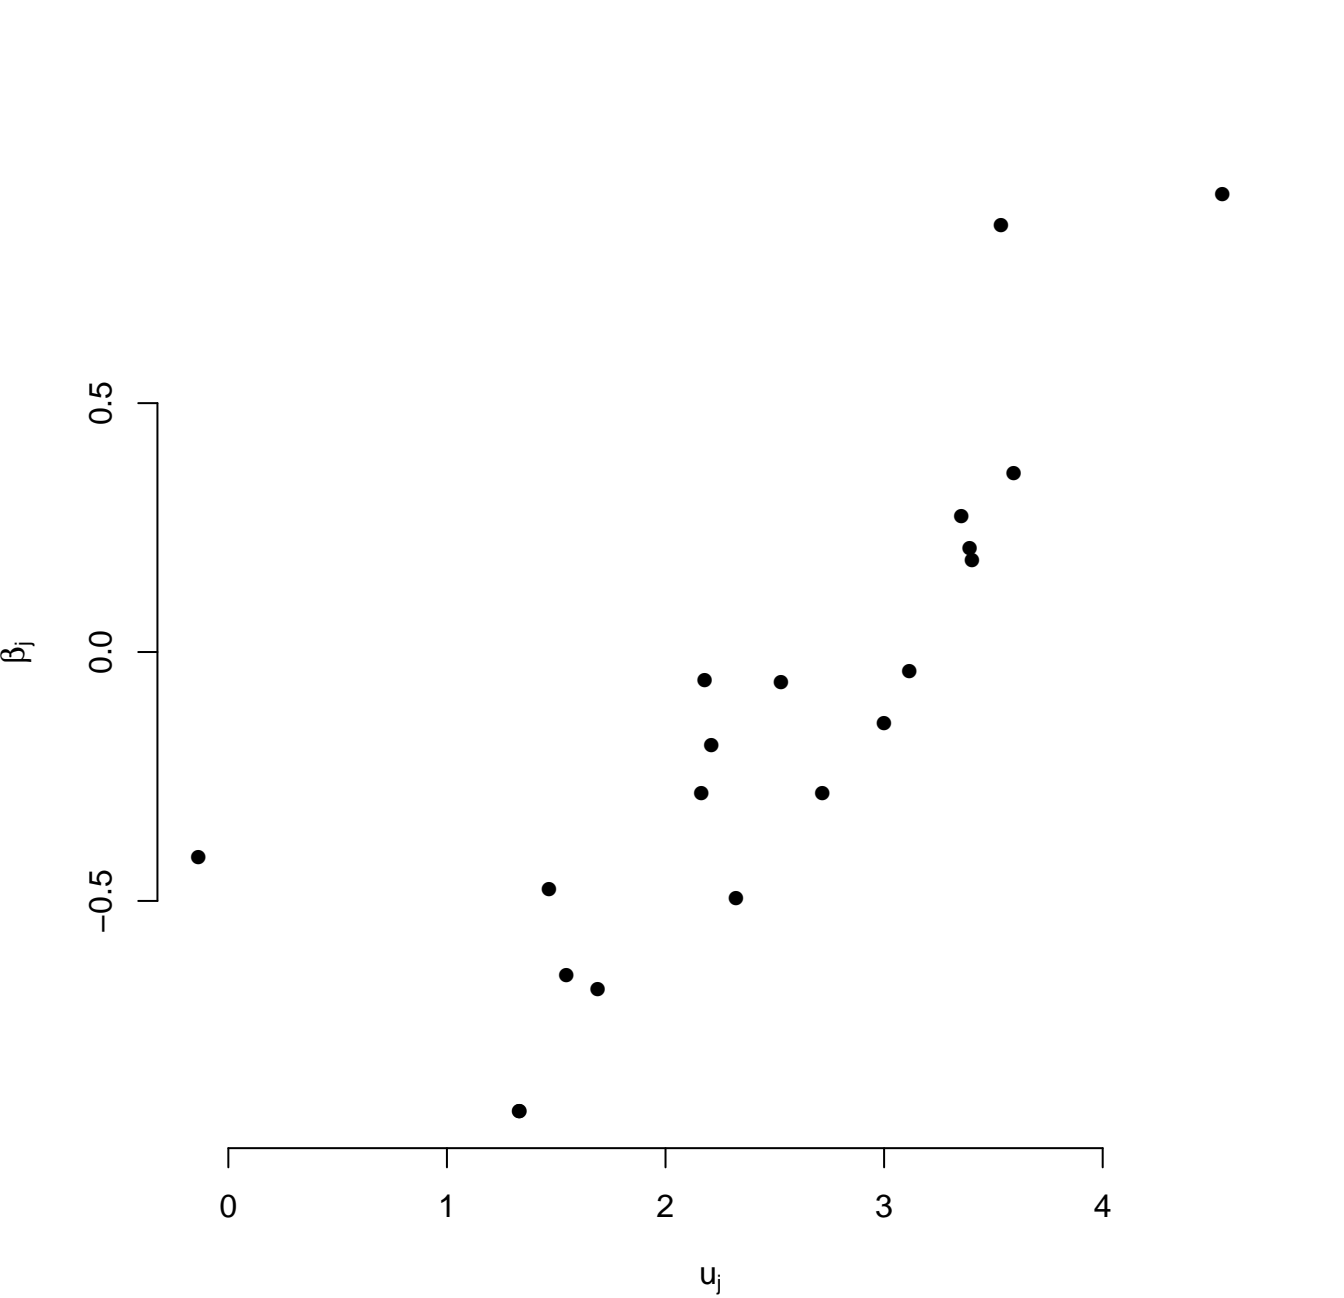

Supplement: Rcode_with_example_plot.zip [file Rcode_with_example_plot.zip]
